# Supplementary material for: E26 Transformation-Specific-1 (ETS1) and WDFY Family Member 4 (WDFY4) Polymorphisms in Chinese Patients with Rheumatoid Arthritis
Source: Int J Mol Sci. 2014 Feb 17;15(2):2712–21. doi: 10.3390/ijms15022712 (PMC3958877; doi:10.3390/ijms15022712)
Supplement: Supplementary file 1 [file ijms-15-02712-s001.pdf]

# Supplementary Information

**Figure S1.** Genotyping of *ETSI* rs1128334 G/A and *WDFY4* rs7097397 A/G by MALDI-TOF-MS.

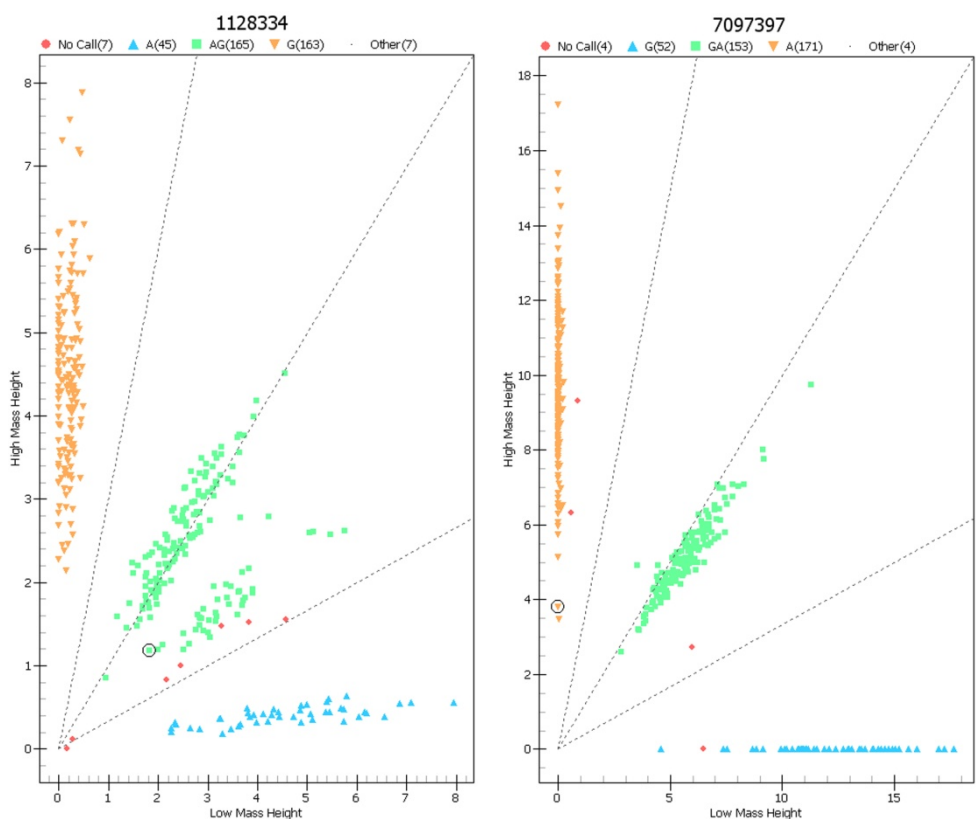

**Table S1.** Logistic regression analysis of associations between *ETSI* rs1128334 G/A and *WDFY4* rs7097397 A/G polymorphisms and risk of rheumatoid arthritis in 429 cases and 797 controls.

| Genotype                   | Cases            |      | Controls         |      | Crude OR<br>(95% CI)    | <i>p</i>     | Adjusted OR<br>(95% CI) | <i>p</i>     |
|----------------------------|------------------|------|------------------|------|-------------------------|--------------|-------------------------|--------------|
|                            | <i>(n = 429)</i> |      | <i>(n = 797)</i> |      |                         |              |                         |              |
|                            | <i>n</i>         | %    | <i>n</i>         | %    |                         |              |                         |              |
| <i>WDFY4</i> rs7097397 A/G |                  |      |                  |      |                         |              |                         |              |
| A allele                   | 539              | 64.0 | 1065             | 67.3 | 1.00                    | —            |                         |              |
| G allele                   | 303              | 36.0 | 517              | 32.7 | 1.16 (0.97–1.38)        | 0.102        |                         |              |
| AA                         | 164              | 39.0 | 364              | 46.0 | 1.00                    | —            | 1.00                    | —            |
| AG                         | 211              | 50.1 | 337              | 42.6 | <b>1.39 (1.08–1.79)</b> | <b>0.011</b> | <b>1.40 (1.08–1.80)</b> | <b>0.010</b> |
| GG                         | 46               | 10.9 | 90               | 11.4 | 1.13 (0.76–1.69)        | 0.537        | 1.13 (0.76–1.69)        | 0.541        |
| GG vs. AG vs. AA           |                  |      |                  |      |                         | <b>0.036</b> |                         |              |
| AG+GG                      | 257              | 61.0 | 427              | 54.0 | <b>1.34 (1.05–1.70)</b> | <b>0.018</b> | <b>1.34 (1.05–1.71)</b> | <b>0.018</b> |
| AA+AG                      | 375              | 89.1 | 701              | 88.6 | 1.00                    | —            | 1.00                    | —            |
| GG                         | 46               | 10.9 | 90               | 11.4 | 0.96 (0.66–1.39)        | 0.814        | 0.95 (0.65–1.39)        | 0.801        |

The genotyping was successful in 421 cases and 791 controls for *WDFY4* rs7097397 A/G. Adjusted for age and sex.
